# Supplementary material for: Wild ducks excrete highly pathogenic avian influenza virus H5N8 (2014–2015) without clinical or pathological evidence of disease
Source: PubMed Central journal article supplement (PMC5906613; doi:10.1038/s41426-018-0070-9), 2018-04-18

Figure S3

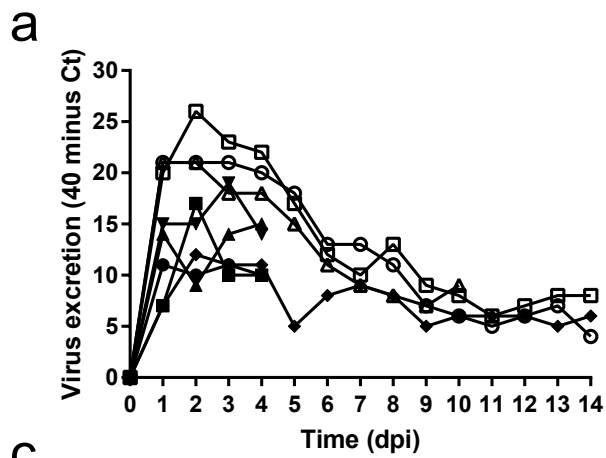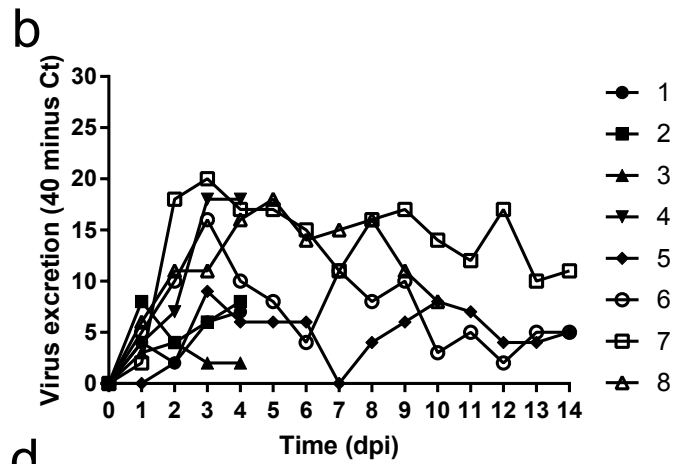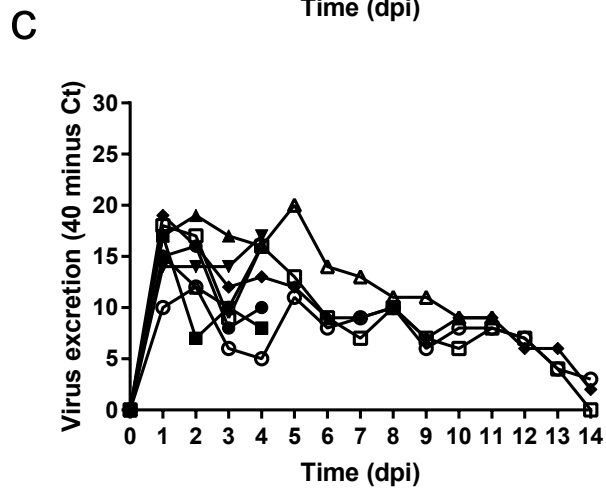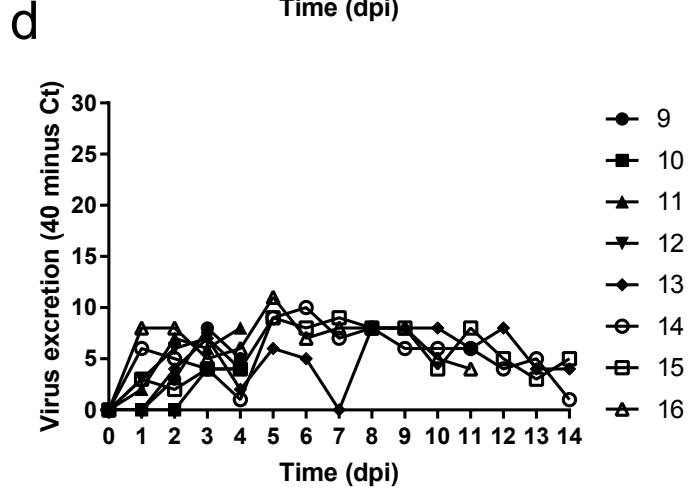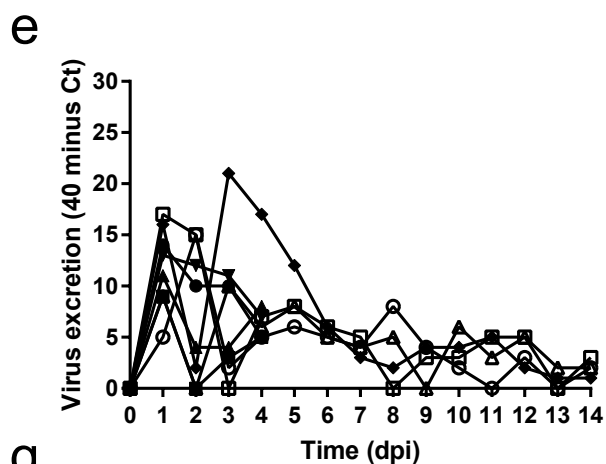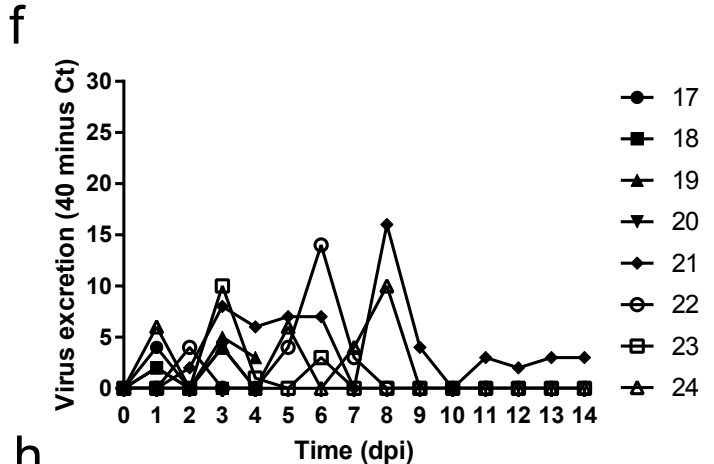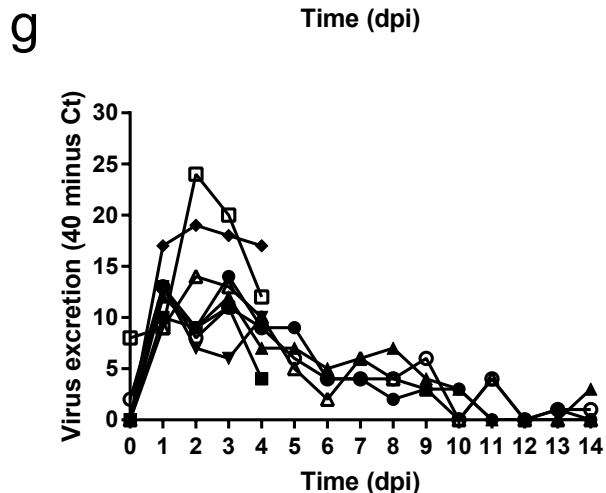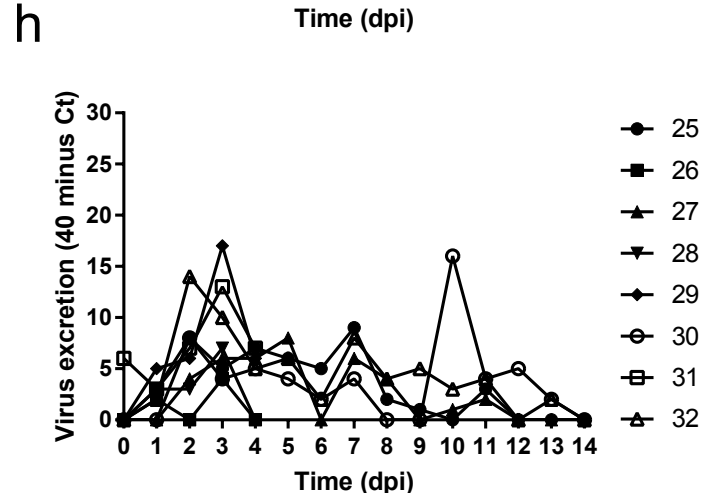

Supplement: 41426_2018_70_MOESM3_ESM.pdf [file 41426_2018_70_MOESM3_ESM.pdf]
