# Supplementary material for: Wild ducks excrete highly pathogenic avian influenza virus H5N8 (2014–2015) without clinical or pathological evidence of disease
Source: PubMed Central journal article supplement (PMC5906613; doi:10.1038/s41426-018-0070-9), 2018-04-18
Supplement: 41426_2018_70_MOESM4_ESM.pdf [file 41426_2018_70_MOESM4_ESM.pdf]

**Table S1.** Isolation of highly pathogenic avian influenza virus A/chicken/Netherlands/eur-3/2014 (H5N8) from organs of wild ducks at 4 days post inoculation (dpi), from organs of domestic chickens at 1 and 2 dpi (exp.) and upon natural infection (nat.), and from swabs at 1–4 dpi

|             |                | Virus titer (log TCID50 per g tissue)* |     |     |     |                    |     |     |    |             |    |    |    |                 |    |     |     |                      |     |     |     |                      |      |      |      |      |
|-------------|----------------|----------------------------------------|-----|-----|-----|--------------------|-----|-----|----|-------------|----|----|----|-----------------|----|-----|-----|----------------------|-----|-----|-----|----------------------|------|------|------|------|
|             |                | Wild birds                             |     |     |     |                    |     |     |    |             |    |    |    | Domestic birds  |    |     |     |                      |     |     |     |                      |      |      |      |      |
| System      | Organ          | Eurasian wigeon no.                    |     |     |     | Common pochard no. |     |     |    | Mallard no. |    |    |    | Common teal no. |    |     |     | Chicken (exp.) no.** |     |     |     | Chicken (nat.) no.** |      |      |      |      |
|             |                | 1                                      | 2   | 3   | 4   | 9                  | 10  | 11  | 12 | 17          | 18 | 19 | 20 | 26              | 28 | 29  | 31  | 33                   | 34  | 35  | 36  | GG.1                 | GG.2 | GG.3 | GG.4 | GG.5 |
| Nervous     | Brain          | -                                      | -   | -   | -   | -                  | -   | -   | -  | -           | -  | -  | -  | -               | -  | -   | -   | 3.5                  | 3.4 | 5.1 | 5.6 | 2.3                  | -    | 3.6  | 5.1  | 4.2  |
| Respiratory | Trachea        | -                                      | -   | -   | -   | -                  | -   | 2.7 | -  | -           | -  | -  | -  | -               | -  | -   | -   | 6.0                  | 4.0 | 5.4 | 7.0 | nd                   | nd   | nd   | nd   | nd   |
|             | Lung           | -                                      | -   | -   | -   | -                  | -   | -   | -  | -           | -  | -  | -  | -               | -  | 3.6 | -   | 6.3                  | 5.6 | 5.6 | 6.4 | 6.3                  | 5.7  | 4.8  | 4.6  | 6.5  |
| Digestive   | Air sac        | -                                      | -   | -   | -   | -                  | -   | 2.7 | -  | -           | -  | -  | -  | -               | -  | 5.5 | -   | 6.8                  | 5.9 | 5.7 | 6.2 | 2.5                  | 4.8  | 7.1  | 2.7  | 7.1  |
|             | Pancreas       | -                                      | -   | 2.0 | -   | -                  | -   | -   | -  | -           | -  | -  | -  | -               | -  | -   | -   | -                    | 2.2 | 3.2 | -   | 4.9                  | 4.2  | 3.2  | -    | -    |
|             | Liver          | -                                      | -   | -   | -   | -                  | -   | 2.9 | -  | -           | -  | -  | -  | -               | -  | -   | -   | 6.5                  | 5.1 | 5.6 | 7.9 | 3.2                  | -    | 3.8  | 4.4  | 5.3  |
| Other       | Jejunum        | -                                      | -   | -   | -   | -                  | -   | -   | -  | -           | -  | -  | -  | -               | -  | -   | -   | 5.5                  | 7.2 | 7.2 | 6.7 | 3.7                  | 5.6  | 5.5  | 5.2  | 6.2  |
|             | Colon          | -                                      | -   | -   | -   | -                  | -   | -   | -  | -           | -  | -  | -  | -               | -  | -   | -   | 6.8                  | 3.4 | 5.8 | 6.1 | 5.8                  | 6.0  | 4.8  | 5.1  | 6.5  |
|             | Heart          | -                                      | -   | -   | -   | -                  | -   | -   | -  | -           | -  | -  | -  | -               | -  | -   | -   | 5.4                  | 4.1 | 4.5 | 6.6 | 2.7                  | 1.9  | 2.3  | 4.2  | 5.3  |
|             | Spleen         | -                                      | -   | -   | -   | -                  | -   | -   | -  | -           | -  | -  | -  | -               | -  | -   | -   | 7.2                  | 6.8 | 5.4 | 7.5 | 4.6                  | 5.1  | 4.8  | 5.0  | 6.5  |
|             | Kidney         | -                                      | -   | -   | -   | -                  | -   | 1.7 | -  | -           | -  | -  | -  | -               | -  | 1.5 | -   | 6.1                  | 5.9 | 5.4 | 7.0 | 5.3                  | 5.6  | -    | 3.8  | 7.5  |
| Swab***     | Cloaca, 1 dpi  | -                                      | -   | -   | -   | -                  | -   | -   | -  | -           | -  | -  | -  | -               | -  | -   | -   | -                    | -   | -   | -   | nd                   | nd   | nd   | nd   | nd   |
|             | Cloaca, 2 dpi  | -                                      | -   | -   | -   | -                  | -   | -   | -  | -           | -  | -  | -  | -               | -  | -   | -   | nd                   | nd  | 4.5 | 4.8 | nd                   | nd   | nd   | nd   | nd   |
|             | Cloaca, 3 dpi  | -                                      | -   | -   | 1.8 | -                  | -   | -   | -  | -           | -  | -  | -  | -               | -  | 2.2 | -   | nd                   | nd  | nd  | nd  | nd                   | nd   | nd   | nd   | nd   |
|             | Cloaca, 4 dpi  | -                                      | -   | -   | -   | -                  | -   | -   | -  | -           | -  | -  | -  | -               | -  | -   | -   | nd                   | nd  | nd  | nd  | nd                   | nd   | nd   | nd   | nd   |
|             | Cloaca         | -                                      | -   | -   | -   | -                  | -   | -   | -  | -           | -  | -  | -  | -               | -  | -   | -   | -                    | -   | -   | -   | 2.5                  | 5.2  | 3.5  | 1.8  | 5.2  |
|             | Pharynx, 1 dpi | -                                      | -   | -   | 0.8 | -                  | 0.8 | -   | -  | -           | -  | -  | -  | -               | -  | -   | -   | 2.5                  | -   | -   | 2.2 | nd                   | nd   | nd   | nd   | nd   |
|             | Pharynx, 2 dpi | -                                      | 1.2 | -   | 1.2 | -                  | -   | 0.8 | -  | -           | -  | -  | -  | -               | -  | 2.8 | 4.8 | nd                   | nd  | 4.8 | 3.8 | nd                   | nd   | nd   | nd   | nd   |
|             | Pharynx, 3 dpi | -                                      | -   | -   | 3.8 | -                  | -   | -   | -  | -           | -  | -  | -  | -               | -  | 3.5 | 3.5 | nd                   | nd  | nd  | nd  | nd                   | nd   | nd   | nd   | nd   |
|             | Pharynx, 4 dpi | -                                      | -   | -   | -   | -                  | -   | -   | -  | -           | -  | -  | -  | -               | -  | 1.2 | -   | nd                   | nd  | nd  | nd  | nd                   | nd   | nd   | nd   | nd   |
|             |                | Pharynx                                | -   | -   | -   | -                  | -   | -   | -  | -           | -  | -  | -  | -               | -  | -   | -   | -                    | -   | -   | -   | -                    | 4.8  | 2.5  | 5.2  | 4.8  |

\*TCID50, median tissue culture infectious dose; white, no virus isolated; yellow, virus titer 0.8–1.9; orange, 2.0–3.9; red, 4.0–5.9; dark red, 6.0–7.9; dpi, days postinoculation.

\*\*Chickens died at 1 day post inoculation (33 and 34) and 2 days postinoculation (35 and 36)

"-"=negative, equal to titer <0.5; nd = no data available

\*\*\*Please note that results for virus excretion via the cloaca and pharynx as shown here are limited to the results of the 16 birds that were euthanized at 4 dpi and serve as a comparison with the findings of the tissues. Results of the remaining 16 birds are not shown here.
