# Supplementary material for: Wild ducks excrete highly pathogenic avian influenza virus H5N8 (2014–2015) without clinical or pathological evidence of disease
Source: PubMed Central journal article supplement (PMC5906613; doi:10.1038/s41426-018-0070-9), 2018-04-18
Supplement: 41426_2018_70_MOESM5_ESM.pdf [file 41426_2018_70_MOESM5_ESM.pdf]

**Table S2.** Detection of highly pathogenic avian influenza virus A/chicken/Netherlands/emc-3/2014 (H5N8) by reverse transcription–PCR from organs of wild ducks at 4 days postinoculation (dpi), from organs of experimentally infected domestic chickens at 1 and 2 dpi, and from swabs at 1–4 dpi.

|             |                | Viral RNA (cycle threshold value per g tissue)* |    |    |    |                    |    |    |    |             |    |    |    |                 |    |    |    |               |    |    |    |
|-------------|----------------|-------------------------------------------------|----|----|----|--------------------|----|----|----|-------------|----|----|----|-----------------|----|----|----|---------------|----|----|----|
|             |                | Wild birds                                      |    |    |    |                    |    |    |    |             |    |    |    | Domestic birds  |    |    |    |               |    |    |    |
| System      | Organ          | Eurasian wigeon no.                             |    |    |    | Common pochard no. |    |    |    | Mallard no. |    |    |    | Common teal no. |    |    |    | Chicken no.** |    |    |    |
|             |                | 1                                               | 2  | 3  | 4  | 9                  | 10 | 11 | 12 | 17          | 18 | 19 | 20 | 26              | 28 | 29 | 31 | 33            | 34 | 35 | 36 |
| Nervous     | Brain          | -                                               | -  | 33 | -  | -                  | -  | -  | 32 | -           | -  | -  | -  | 33              | -  | 28 | 31 | 20            | 22 | 14 | 16 |
| Respiratory | Trachea        | -                                               | 24 | 25 | 21 | 20                 | 29 | 23 | 25 | 27          | 25 | 27 | 24 | 21              | 24 | 21 | 27 | 14            | 15 | 11 | 11 |
|             | Lung           | -                                               | 28 | 22 | 19 | 30                 | 27 | 25 | 25 | 32          | 33 | 25 | 29 | 27              | 27 | 17 | 25 | 19            | 18 | 20 | 15 |
| Digestive   | Air sac        | 31                                              | 22 | 17 | 9  | 31                 | 23 | 15 | 15 | -           | 26 | 24 | 27 | 24              | 24 | 9  | 16 | 9             | 15 | 13 | 11 |
|             | Pancreas       | -                                               | -  | 28 | 28 | 31                 | 33 | 29 | 32 | -           | -  | 34 | 35 | -               | 27 | 25 | 33 | 17            | 15 | 16 | 15 |
|             | Liver          | -                                               | 36 | 29 | 28 | 31                 | 32 | 23 | 29 | -           | -  | -  | 32 | 33              | 32 | 25 | 31 | 16            | 15 | 18 | 12 |
|             | Jejunum        | -                                               | -  | 25 | 22 | -                  | 32 | 30 | 29 | -           | -  | 30 | 31 | 31              | 28 | 21 | 30 | 14            | 17 | 15 | 11 |
| Other       | Colon          | -                                               | -  | 22 | 24 | 32                 | 32 | 29 | 28 | -           | -  | 30 | 32 | 32              | 22 | 19 | 29 | 13            | 11 | 10 | 11 |
|             | Heart          | -                                               | -  | 32 | 30 | 33                 | 31 | 29 | 32 | -           | -  | -  | -  | 30              | 34 | 23 | 31 | 14            | 16 | 9  | 10 |
|             | Spleen         | -                                               | -  | 30 | 21 | 25                 | 26 | 28 | 26 | -           | 30 | 30 | 30 | 26              | 22 | 19 | 22 | 13            | 14 | 15 | 11 |
|             | Kidney         | 37                                              | -  | 22 | 25 | 32                 | 30 | 25 | 30 | 33          | -  | 33 | 25 | 32              | 27 | 25 | 32 | 18            | 17 | 13 | 13 |
| Swab***     | Cloaca, 1 dpi  | 36                                              | 32 | 37 | 36 | -                  | -  | 38 | 37 | 36          | 38 | 38 | -  | 38              | 37 | 35 | 37 | 31            | 39 | 31 | 36 |
|             | Cloaca, 2 dpi  | 38                                              | 36 | 36 | 33 | 37                 | -  | 33 | 34 | -           | -  | -  | -  | -               | 37 | 34 | 33 | nd            | nd | 17 | 19 |
|             | Cloaca, 3 dpi  | 34                                              | 34 | 38 | 22 | 32                 | 36 | 34 | 33 | -           | -  | 35 | 36 | 36              | 33 | 23 | 27 | nd            | nd | nd | nd |
|             | Cloaca, 4 dpi  | 33                                              | 32 | 38 | 22 | 35                 | 36 | 32 | 36 | -           | -  | 37 | -  | -               | -  | 34 | 33 | nd            | nd | nd | nd |
|             | Pharynx, 1 dpi | 29                                              | 33 | 26 | 25 | 25                 | 23 | 23 | 26 | 26          | 31 | 29 | 27 | 30              | 27 | 23 | 31 | 21            | 26 | 28 | 22 |
|             | Pharynx, 2 dpi | 30                                              | 23 | 31 | 25 | 24                 | 33 | 21 | 26 | 30          | -  | 36 | 28 | 31              | 33 | 21 | 16 | nd            | nd | 18 | 22 |
|             | Pharynx, 3 dpi | 29                                              | 30 | 26 | 21 | 32                 | 30 | 23 | 26 | 30          | 37 | 36 | 29 | 29              | 34 | 22 | 20 | nd            | nd | nd | nd |
|             | Pharynx, 4 dpi | 30                                              | 30 | 25 | 26 | 30                 | 32 | 24 | 23 | 35          | 35 | 32 | 33 | 36              | 30 | 23 | 28 | nd            | nd | nd | nd |

\*White, no virus detected; yellow, 30–39 Ct; orange, 20–29 Ct; red, 10–19 Ct; dark red, 1–9 Ct; dpi, days postinoculation.

\*\*Domestic chickens died at 1 day postinoculation (33 and 34) and 2 days postinoculation (35 and 36)

\*\*\*cycle threshold value per 200 microliter

"-"=negative, equal to titer <0.5; nd = no data available
