# Supplementary material for: Wild ducks excrete highly pathogenic avian influenza virus H5N8 (2014–2015) without clinical or pathological evidence of disease
Source: PubMed Central journal article supplement (PMC5906613; doi:10.1038/s41426-018-0070-9), 2018-04-18
Supplement: 41426_2018_70_MOESM6_ESM.pdf [file 41426_2018_70_MOESM6_ESM.pdf]

**Table S3.** Expression of antigen in organs of wild ducks at 4 days postinoculation (dpi) with highly pathogenic avian influenza virus A/chicken/Netherlands/eur-3/2014 (H5N8) and in organs of domestic chickens at 1 and 2 dpi (exp.) and upon natural infection (nat.)

|             |                 | Antigen expression per species* |    |    |    |                    |    |     |    |             |    |    |    |                 |    |     |    |                      |     |     |    |                      |      |      |      |      |
|-------------|-----------------|---------------------------------|----|----|----|--------------------|----|-----|----|-------------|----|----|----|-----------------|----|-----|----|----------------------|-----|-----|----|----------------------|------|------|------|------|
|             |                 | Wild birds                      |    |    |    |                    |    |     |    |             |    |    |    | Domestic birds  |    |     |    |                      |     |     |    |                      |      |      |      |      |
| System      | Organ           | Eurasian wigeon no.**           |    |    |    | Common pochard no. |    |     |    | Mallard no. |    |    |    | Common teal no. |    |     |    | Chicken (exp.) no.** |     |     |    | Chicken (nat.) no.** |      |      |      |      |
|             |                 | 1                               | 2  | 3  | 4  | 9                  | 10 | 11  | 12 | 17          | 18 | 19 | 20 | 26              | 28 | 29  | 31 | 33                   | 34  | 35  | 36 | GG.1                 | GG.2 | GG.3 | GG.4 | GG.5 |
| Nervous     | Brain           | -                               | -  | -  | -  | -                  | -  | -   | -  | -           | -  | -  | -  | -               | -  | -   | -  | -                    | +/- | +   | +  | -                    | -    | +    | +/-  | +/-  |
| Respiratory | Nose            | -                               | -  | -  | -  | -                  | -  | -   | -  | -           | -  | -  | -  | -               | -  | +/- | -  | +                    | +   | +   | +  | -                    | -    | +    | +    | +    |
|             | Trachea         | -                               | -  | -  | -  | -                  | -  | -   | -  | -           | -  | -  | -  | -               | -  | -   | -  | +/-                  | -   | +   | +  | -                    | +/-  | -    | +    | +    |
|             | Lung            | -                               | -  | -  | -  | -                  | -  | -   | -  | -           | -  | -  | -  | -               | -  | -   | -  | +                    | +   | ++  | ++ | +                    | +    | +    | +    | +    |
| Digestive   | Air sac         | -                               | -  | -  | -  | -                  | -  | +/- | -  | -           | -  | -  | -  | -               | -  | +   | -  | ++                   | ++  | +   | ++ | +                    | +    | +    | +    | +    |
|             | Esophagus       | -                               | -  | -  | -  | -                  | -  | -   | -  | -           | -  | -  | -  | -               | -  | -   | -  | +                    | +   | +   | +  | nd                   | nd   | nd   | nd   | nd   |
|             | Proventriculus  | -                               | -  | -  | -  | -                  | -  | -   | -  | -           | -  | nd | -  | -               | -  | -   | -  | +                    | +/- | +   | +  | -                    | -    | nd   | -    | +    |
|             | Duodenum        | -                               | -  | -  | -  | -                  | -  | -   | -  | -           | -  | -  | -  | -               | -  | -   | -  | +                    | +   | +   | +  | nd                   | nd   | nd   | nd   | nd   |
|             | Pancreas**      | -                               | -  | -  | -  | -                  | -  | -   | -  | -           | -  | -  | -  | -               | -  | -   | -  | +/-                  | +/- | +   | +  | +                    | +    | +    | +    | +    |
|             | Liver           | -                               | -  | -  | -  | -                  | -  | -   | -  | -           | -  | -  | -  | -               | -  | -   | -  | +/-                  | +/- | ++  | ++ | +/-                  | -    | +/-  | +/-  | +/-  |
|             | Jejunum         | -                               | -  | -  | -  | -                  | -  | -   | -  | -           | -  | -  | -  | -               | -  | -   | -  | +                    | +   | +   | +  | +                    | +    | +    | +    | +    |
|             | Ileum           | -                               | -  | -  | -  | -                  | -  | -   | -  | -           | -  | -  | -  | -               | -  | -   | -  | +                    | +   | +   | +  | nd                   | nd   | nd   | nd   | nd   |
| Other       | Caecum          | -                               | -  | -  | -  | -                  | -  | -   | -  | -           | -  | -  | -  | -               | -  | -   | -  | +                    | +   | +   | +  | +                    | +    | +    | +    | +    |
|             | Colon           | -                               | -  | -  | -  | -                  | -  | -   | -  | -           | -  | -  | -  | -               | -  | -   | -  | +                    | +   | +   | +  | +                    | +    | +    | +    | +    |
|             | Bursa           | -                               | -  | -  | -  | -                  | -  | -   | -  | -           | -  | -  | -  | -               | -  | -   | -  | nd                   | nd  | nd  | nd | nd                   | nd   | nd   | nd   | nd   |
|             | Heart           | -                               | -  | -  | -  | -                  | -  | -   | -  | -           | -  | -  | -  | -               | -  | -   | -  | +                    | +/- | ++  | ++ | +/-                  | -    | +    | +    | +    |
|             | Pectoral muscle | -                               | -  | -  | -  | -                  | -  | -   | nd | -           | -  | -  | -  | -               | -  | -   | -  | -                    | -   | -   | -  | nd                   | nd   | nd   | nd   | nd   |
|             | Spleen          | -                               | -  | -  | -  | -                  | -  | -   | -  | -           | -  | -  | -  | -               | -  | -   | -  | +                    | +   | +   | +  | +                    | -    | +    | +    | +    |
|             | Kidney          | -                               | -  | -  | -  | -                  | -  | -   | -  | nd          | -  | -  | -  | -               | -  | -   | -  | -                    | +/- | +   | +  | -                    | -    | nd   | -    | +    |
|             | Adrenal         | nd                              | nd | -  | -  | -                  | -  | -   | -  | -           | -  | nd | -  | -               | -  | -   | -  | +                    | nd  | nd  | nd | nd                   | nd   | nd   | nd   | nd   |
| Gonad       | -               | -                               | -  | -  | -  | -                  | -  | -   | -  | -           | -  | -  | -  | -               | -  | -   | +  | +                    | +   | +   | nd | nd                   | nd   | nd   | nd   |      |
| Oviduct     | nd              | nd                              | nd | nd | nd | nd                 | nd | nd  | nd | nd          | nd | nd | nd | nd              | nd | nd  | ++ | -                    | ++  | ++  | nd | nd                   | nd   | nd   | nd   |      |
| Wattle      | nd              | nd                              | nd | nd | nd | nd                 | nd | nd  | nd | nd          | nd | nd | nd | nd              | nd | nd  | +  | +                    | +++ | +++ | -  | -                    | -    | +/-  | -    |      |

\*White, no cells positive; yellow, rare number of cells positive; orange, moderate number cells positive; red many cells positive

"- "=negative, equal to titer <0.5; nd = no data available

\*\*Acinar cells of the pancreas of Eurasian wigeon no. 8 - euthanized at 10 dpi - were +/- positive.
