# Supplementary material for: Wild ducks excrete highly pathogenic avian influenza virus H5N8 (2014–2015) without clinical or pathological evidence of disease
Source: PubMed Central journal article supplement (PMC5906613; doi:10.1038/s41426-018-0070-9), 2018-04-18
Supplement: 41426_2018_70_MOESM7_ESM.pdf [file 41426_2018_70_MOESM7_ESM.pdf]

**Table S4.** Overview of duck species experimentally inoculated with highly pathogenic avian influenza H5 H5 GsGd viruses (part 1 of 2)

| Species          | Type of duck | Host age | Virus                                     | Subtype | Clade   | Culture method | Route of    |  | Dose of inoculation                                       | Volume (ml) | Clinical signs             | Mortality     |
|------------------|--------------|----------|-------------------------------------------|---------|---------|----------------|-------------|--|-----------------------------------------------------------|-------------|----------------------------|---------------|
|                  |              |          |                                           |         |         |                | inoculation |  |                                                           |             |                            |               |
| Mallard          | dabbling     | adult    | A/broiler duck/Kr/Buan2/2014              | H5N8    | 2.3.4.4 | egg            | IN or CON   |  | 10 <sup>6.5</sup> EID50                                   | 0.1         | no or mild                 | no            |
| Mallard          | dabbling     | adult    | A/chicken/Kr/IS/2006                      | H5N1    | 2.2     | egg            | IN or CON   |  | 10 <sup>6.5</sup> EID50                                   | 0.1         | no or mild                 | no            |
| Mallard          | dabbling     | adult    | A/mandarin duck/PSCC24-24/2010            | H5N1    | 2.3.2.1 | egg            | IN or CON   |  | 10 <sup>6.5</sup> EID50                                   | 0.1         | no or mild                 | no            |
| Baikal teal      | dabbling     | adult    | A/broiler duck/Kr/Buan2/2014              | H5N8    | 2.3.4.4 | egg            | IN          |  | 10 <sup>6.5</sup> EID50                                   | 0.1         | no                         | yes           |
| Mallard          | dabbling     | 8-11 mo  | A/turkey/Turkey/1/2005                    | H5N1    | 2.2.1   | egg            | IT and IO   |  | 10 <sup>4</sup> TCID50                                    | 3           | no                         | no            |
| Tufted duck      | diving       | 8-11 mo  | A/turkey/Turkey/1/2005                    | H5N1    | 2.2.1   | egg            | IT and IO   |  | 10 <sup>4</sup> TCID50                                    | 3           | yes                        | unspecified   |
| Common pochard   | diving       | 8-11 mo  | A/turkey/Turkey/1/2005                    | H5N1    | 2.2.1   | egg            | IT and IO   |  | 10 <sup>4</sup> TCID50                                    | 3           | yes                        | yes           |
| Common teal      | dabbling     | 8-11 mo  | A/turkey/Turkey/1/2005                    | H5N1    | 2.2.1   | egg            | IT and IO   |  | 10 <sup>4</sup> TCID50                                    | 3           | no                         | no            |
| Eurasian wigeon  | dabbling     | 8-11 mo  | A/turkey/Turkey/1/2005                    | H5N1    | 2.2.1   | egg            | IT and IO   |  | 10 <sup>4</sup> TCID50                                    | 3           | no                         | no            |
| Gadwall          | dabbling     | 8-11 mo  | A/turkey/Turkey/1/2005                    | H5N1    | 2.2.1   | egg            | IT and IO   |  | 10 <sup>4</sup> TCID50                                    | 3           | no                         | no            |
| Mallard          | dabbling     | 2 wk     | A/turkey/Minnesota/12582/2015             | H5N2    | 2.3.4.4 | egg in BHI     | IN or CON   |  | 10 <sup>2</sup> ; 10 <sup>4</sup> ; 10 <sup>6</sup> EID50 | 0.1         | no                         | yes           |
| Mallard          | dabbling     | 2 wk     | A/chicken/Iowa/13388/2015                 | H5N2    | 2.3.4.4 | egg in BHI     | IN or CON   |  | 10 <sup>2</sup> ; 10 <sup>4</sup> ; 10 <sup>6</sup> EID50 | 0.1         | no                         | no            |
| Mallard          | dabbling     | 2 wk     | A/northerin pintail/Washington/40964/2014 | H5N2    | 2.3.4.4 | egg in BHI     | IN or CON   |  | 10 <sup>2</sup> ; 10 <sup>4</sup> ; 10 <sup>6</sup> EID50 | 0.1         | no                         | no            |
| Mallard          | dabbling     | 2 wk     | A/gyrfalcon/Washington/40188-6/2014       | H5N8    | 2.3.4.4 | egg in BHI     | IN or CON   |  | 10 <sup>2</sup> ; 10 <sup>4</sup> ; 10 <sup>6</sup> EID50 | 0.1         | no                         | no            |
| Mallard          | dabbling     | 2 wk     | A/whooper swan/Mongolia/244/2005          | H5N1    | 2.2     | egg in BHI     | IN or CON   |  | 10 <sup>2</sup> ; 10 <sup>4</sup> ; 10 <sup>6</sup> EID50 | 0.1         | yes                        | yes           |
| Mallard          | dabbling     | 2 wk     | A/northerin pintail/Washington/40964/2014 | H5N2    | 2.3.4.4 | egg in BHI     | IN          |  | 10 <sup>6</sup> EID50                                     | 0.1         | yes but 0 dpi<br>not shown | no            |
| Mallard          | dabbling     | 2 wk     | A/gyrfalcon/Washington/40188-6/2014       | H5N8    | 2.3.4.4 | egg in BHI     | IN          |  | 10 <sup>6</sup> EID50                                     | 0.1         | yes but 0 dpi<br>not shown | not specified |
| Mallard          | dabbling     | 2 wk     | A/whooper swan/Mongolia/244/2005          | H5N1    | 2.2     | egg in BHI     | IN          |  | 10 <sup>6</sup> EID50                                     | 0.1         | yes                        | yes           |
| Mallard          | dabbling     | 6 wk     | A/goose/Shandong/k1204/2009               | H5N5    | 2.3.4.4 | MDCK           | IN          |  | 10 <sup>6</sup> TCID50                                    | 0.1         | not specified              | no            |
| Mallard          | dabbling     | 6 wk     | A/goose/Guangdong/k0103/2010              | H5N5    | 2.3.4.4 | MDCK           | IN          |  | 10 <sup>6</sup> TCID50                                    | 0.1         | not specified              | no            |
| Mallard          | dabbling     | 6 wk     | A/quail/Jiangsu/k0104/2010                | H5N5    | 2.3.4.4 | MDCK           | IN          |  | 10 <sup>6</sup> EID50                                     | 0.1         | yes                        | no            |
| Mallard          | dabbling     | 6 wk     | A/duck/Jiangsu/k1203/2010                 | H5N8    | 2.3.4.4 | MDCK           | IN          |  | 10 <sup>6</sup> TCID50                                    | 0.1         | not specified              | no            |
| Mandarin duck    | dabbling     | adult    | A/broiler duck/Kr/Buan2/2014              | H5N8    | 2.3.4.4 | egg            | IN or CON   |  | 10 <sup>6.5</sup> EID50                                   | 0.1         | no                         | no            |
| Mandarin duck    | dabbling     | adult    | A/chicken/Kr/IS/2006                      | H5N1    | 2.2     | egg            | IN or CON   |  | 10 <sup>6.5</sup> EID50                                   | 0.1         | no                         | no            |
| Mandarin duck    | dabbling     | adult    | A/mandarin duck/Kr/PSC24-24/2010          | H5N1    | 2.3.2.1 | egg            | IN or CON   |  | 10 <sup>6.5</sup> EID50                                   | 0.1         | no                         | no            |
| Redhead          | diving       | 10-16 wk | A/whooper swan/Mongolia/244/2005          | H5N1    | 2.2     | egg in BHI     | IN          |  | 10 <sup>6</sup> EID50                                     | 0.1         | no                         | no            |
| Wood duck        | dabbling     | 10-16 wk | A/whooper swan/Mongolia/244/2005          | H5N1    | 2.2     | egg in BHI     | IN          |  | 10 <sup>6</sup> EID50                                     | 0.1         | yes                        | yes           |
| Blue-winged teal | dabbling     | 10-16 wk | A/whooper swan/Mongolia/244/2005          | H5N1    | 2.2     | egg in BHI     | IN          |  | 10 <sup>6</sup> EID50                                     | 0.1         | no                         | no            |
| Northern pintail | dabbling     | 10-16 wk | A/whooper swan/Mongolia/244/2005          | H5N1    | 2.2     | egg in BHI     | IN          |  | 10 <sup>6</sup> EID50                                     | 0.1         | no                         | no            |
| Mallard          | dabbling     | 10-16 wk | A/duck meat/Anjang/2001                   | H5N1    | 0       | egg in BHI     | IN          |  | 10 <sup>6</sup> EID50                                     | 0.1         | no                         | no            |
| Redhead          | diving       | 10-16 wk | A/duck meat/Anjang/2001                   | H5N1    | 0       | egg in BHI     | IN          |  | 10 <sup>6</sup> EID50                                     | 0.1         | no                         | no            |
| Wood duck        | dabbling     | 10-16 wk | A/duck meat/Anjang/2001                   | H5N1    | 0       | egg in BHI     | IN          |  | 10 <sup>6</sup> EID50                                     | 0.1         | yes                        | yes           |
| Blue-winged teal | dabbling     | 10-16 wk | A/duck meat/Anjang/2001                   | H5N1    | 0       | egg in BHI     | IN          |  | 10 <sup>6</sup> EID50                                     | 0.1         | no                         | no            |
| Northern pintail | dabbling     | 10-16 wk | A/duck meat/Anjang/2001                   | H5N1    | 0       | egg in BHI     | IN          |  | 10 <sup>6</sup> EID50                                     | 0.1         | no                         | no            |
| Tufted duck      | diving       | 5 mo     | A/duck/Hong Kong/21091/2011               | H5N1    | 2.3.2   | MDCK           | IT and IO   |  | 10 <sup>4</sup> TCID50                                    | 3           | yes                        | yes           |

**Table S4.** Overview of duck species experimentally inoculated with highly pathogenic avian influenza H5 H5 GsGd viruses (part 2 of 2)

| Species          | Virus excretion | Virus excretion | Virus excretion                                                      | Days postinoculation | Virus replication (IHC)                             | Virus replication (VI)                                            | Reference                   |
|------------------|-----------------|-----------------|----------------------------------------------------------------------|----------------------|-----------------------------------------------------|-------------------------------------------------------------------|-----------------------------|
|                  | Pharynx         | Cloacal         | Method                                                               |                      | Samples organs                                      | test done, result int                                             |                             |
| Mallard          | yes             | yes             | TCID50/0.1ml per day or tissue                                       | 3                    | no                                                  | yes, pos int (pancreas)                                           | Kang et al. 2015            |
| Mallard          | yes             | no              | TCID50/0.1ml per day or tissue                                       | 3                    | no                                                  | yes, neg int                                                      | Kang et al. 2015            |
| Mallard          | yes             | no              | TCID50/0.1ml per day or tissue                                       | 3                    | no                                                  | yes, neg int                                                      | Kang et al. 2015            |
| Baikal teal      | yes             | yes             | TCID50/0.1ml per day or tissue                                       | 3                    | no                                                  | yes, pos int (pancreas)                                           | Kang et al. 2015            |
| Mallard          | yes             | no              | TCID50/ml and vRNA Ct value per day or tissue; AUC 0-4 dpi           | 4                    | yes, neg int                                        | yes, neg int                                                      | Keawcharoen et al. 2008     |
| Tufted duck      | yes             | no              | TCID50/ml and vRNA Ct value per day or tissue; AUC 0-4 dpi           | 4                    | yes, neg int                                        | yes, pos int                                                      | Keawcharoen et al. 2008     |
| Common pochard   | yes             | yes             | TCID50/ml and vRNA Ct value per day or tissue; AUC 0-4 dpi           | 4                    | yes, neg int                                        | yes, pos int                                                      | Keawcharoen et al. 2008     |
| Common teal      | yes             | yes             | TCID50/ml and vRNA Ct value per day or tissue; AUC 0-4 dpi           | 4                    | yes, neg int                                        | yes, neg int                                                      | Keawcharoen et al. 2008     |
| Eurasian wigeon  | yes             | no              | TCID50/ml and vRNA Ct value per day or tissue; AUC 0-4 dpi           | 4                    | yes, neg int                                        | yes, pos int                                                      | Keawcharoen et al. 2008     |
| Gadwall          | yes             | no              | TCID50/ml and vRNA Ct value per day or tissue; AUC 0-4 dpi           | 4                    | yes, pos int                                        | yes, pos int                                                      | Keawcharoen et al. 2008     |
| Mallard          | yes             | yes             | qPCR used to calculate EID50/ml per day or tissue                    | 3                    | yes, excl int                                       | no                                                                | DeJesus et al. 2016         |
| Mallard          | yes             | yes             | qPCR used to calculate EID50/ml per day or tissue                    | 3                    | yes, excl int                                       | no                                                                | DeJesus et al. 2016         |
| Mallard          | yes             | yes             | qPCR used to calculate EID50/ml per day or tissue                    | nd                   | nd                                                  | nd                                                                | DeJesus et al. 2016         |
| Mallard          | yes             | yes             | qPCR used to calculate EID50/ml per day or tissue                    | nd                   | nd                                                  | nd                                                                | DeJesus et al. 2016         |
| Mallard          | yes             | yes             | qPCR used to calculate EID50/ml per day or tissue                    | nd                   | nd                                                  | nd                                                                | DeJesus et al. 2016         |
| Mallard          | yes             | yes             | qPCR used to calculate EID50/ml per day or tissue                    | 4                    | yes, neg int                                        | yes, excl int                                                     | Pantin-Jackwood et al. 2016 |
| Mallard          | yes             | yes             | qPCR used to calculate EID50/ml per day or tissue                    | 4                    | yes, neg int                                        | yes, excl int                                                     | Pantin-Jackwood et al. 2016 |
| Mallard          | yes             | yes             | qPCR used to calculate EID50/ml per day or tissue                    | 4                    | yes, pos int (autonomic ganglia enteric tract)      | yes, excl int                                                     | Pantin-Jackwood et al. 2016 |
| Mallard          | yes             | yes             | TCID50 per day or per gram                                           | 5                    | no                                                  | yes, excl int                                                     | Zhao et al. 2013            |
| Mallard          | yes             | yes             | TCID50 per day or per gram                                           | 5                    | no                                                  | yes, excl int                                                     | Zhao et al. 2013            |
| Mallard          | yes             | yes             | EID50 per day or per gram                                            | 5                    | no                                                  | yes, excl int                                                     | Zhao et al. 2013            |
| Mallard          | yes             | yes             | TCID50 per day or per gram                                           | 5                    | no                                                  | yes, excl int                                                     | Zhao et al. 2013            |
| Mandarin duck    | yes             | yes             | TCID50/0.1ml per day in figure                                       | 3                    | no                                                  | yes, pos int (pancreas) and proventriculus                        | Kang et al. 2017            |
| Mandarin duck    | yes             | yes             | TCID50/0.1ml per day in figure                                       | 3                    | no                                                  | yes, neg int                                                      | Kang et al. 2017            |
| Mandarin duck    | yes             | yes             | TCID50/0.1ml per day in figure                                       | 3                    | no                                                  | yes, neg int                                                      | Kang et al. 2017            |
| Redhead          | yes             | yes             | EID50/ml per tissue; EID50/ml for average max titer; duration (days) | nd                   | no                                                  | yes, neg int                                                      | Brown et al. 2006           |
| Wood duck        | yes             | yes             | EID50/ml per tissue; EID50/ml for average max titer; duration (days) | 7 and 8              | yes, pos int (muscular plexus of small intestines)* | yes, excl int                                                     | Brown et al. 2006           |
| Blue-winged teal | yes             | yes             | EID50/ml per tissue; EID50/ml for average max titer; duration (days) | nd                   | no                                                  | yes, neg int                                                      | Brown et al. 2006           |
| Northern pintail | yes             | yes             | EID50/ml per tissue; EID50/ml for average max titer; duration (days) | nd                   | no                                                  | yes, neg int                                                      | Brown et al. 2006           |
| Mallard          | yes             | yes             | EID50/ml per tissue; EID50/ml for average max titer; duration (days) | nd                   | no                                                  | yes, neg int                                                      | Brown et al. 2006           |
| Redhead          | yes             | no              | EID50/ml per tissue; EID50/ml for average max titer; duration (days) | nd                   | no                                                  | yes, neg int                                                      | Brown et al. 2006           |
| Wood duck        | yes             | yes             | EID50/ml per tissue; EID50/ml for average max titer; duration (days) | not specified        | yes, pos int (muscular plexus of small intestines)* | yes, excl int                                                     | Brown et al. 2006           |
| Blue-winged teal | yes             | no              | EID50/ml per tissue; EID50/ml for average max titer; duration (days) | nd                   | no                                                  | yes, neg int                                                      | Brown et al. 2006           |
| Northern pintail | yes             | no              | EID50/ml per tissue; EID50/ml for average max titer; duration (days) | nd                   | no                                                  | yes, neg int                                                      | Brown et al. 2006           |
| Tufted duck      | yes             | yes             | TCID50/ml and vRNA Ct value per day or tissue                        | 4                    | yes, pos int (=pancreas)                            | yes, pos int (proventriculus, duodenum, pancreas, jejunum, colon) | Bröjer et al. 2015          |
